# Supplementary material for: Candida auris Forms High-Burden Biofilms in Skin Niche Conditions and on Porcine Skin
Source: PubMed Central journal article supplement (PMC6977180; doi:10.1128/msphere.00910-19), 2020-01-15
Supplement: mSphere.00910-19-sf001.pdf [file mSphere.00910-19-sf001.pdf]

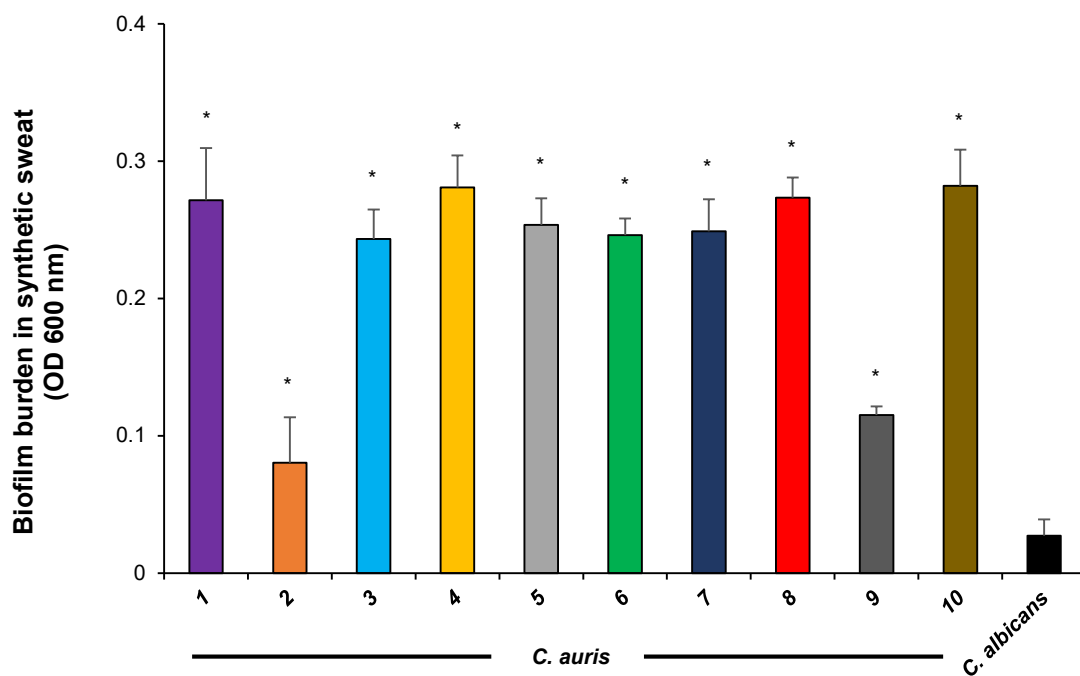

**Fig. S1. Diverse strains of *C. auris* form biofilms in synthetic sweat.** *Candida* biofilms were grown in synthetic sweat media and burdens were measured by absorbance at 600nm. *C. auris* biofilm burdens were analyzed using one-way ANOVA with Holm-Sidak post-test comparison to control (*C. albicans*), \* $P < 0.05$ , standard deviation shown,  $n=4$ .
