# Supplementary material for: Candida auris Forms High-Burden Biofilms in Skin Niche Conditions and on Porcine Skin
Source: PubMed Central journal article supplement (PMC6977180; doi:10.1128/msphere.00910-19), 2020-01-15
Supplement: mSphere.00910-19-sf002.pdf [file mSphere.00910-19-sf002.pdf]

## Synthetic sweat

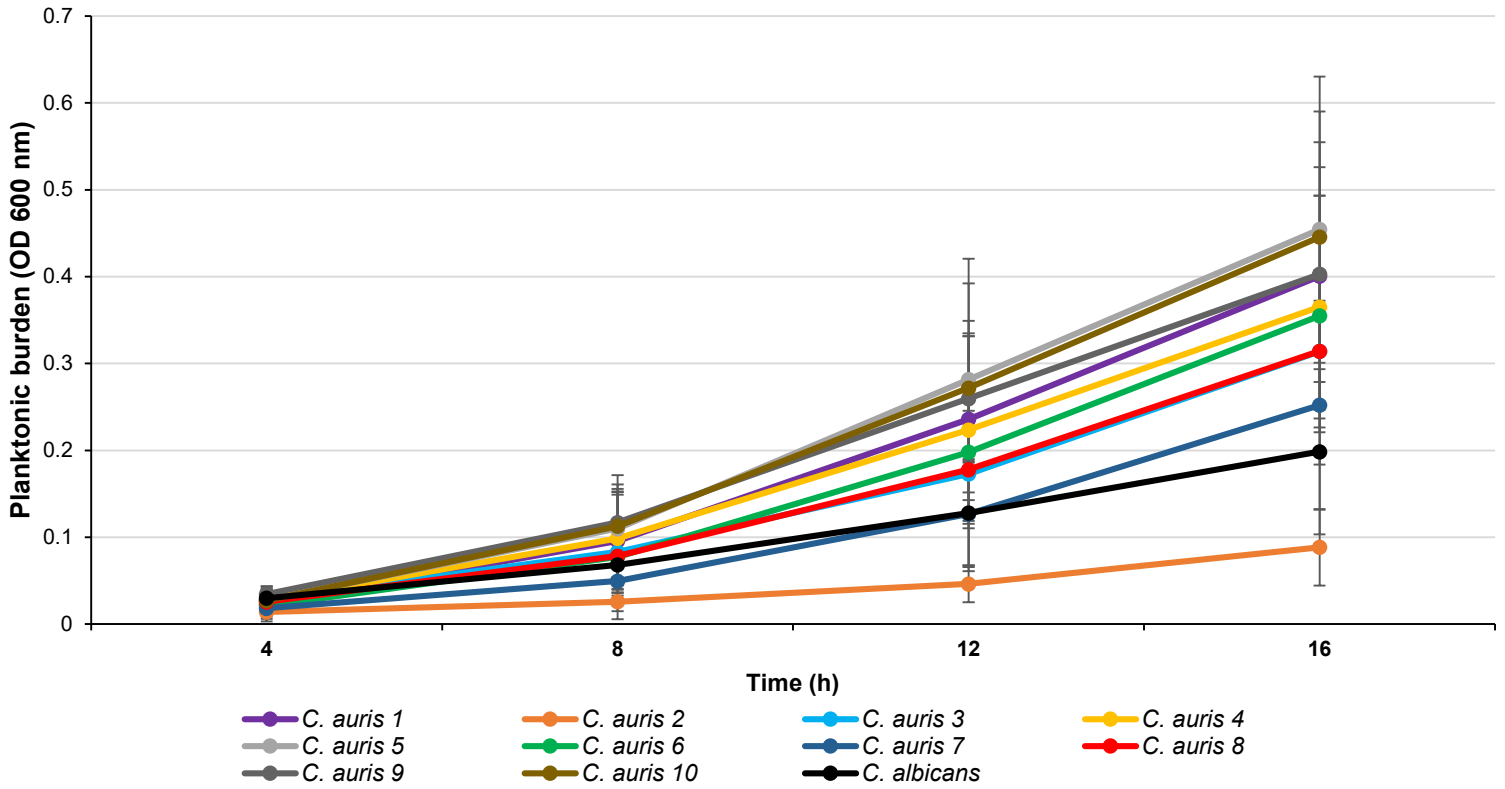

4 h Synthetic sweat

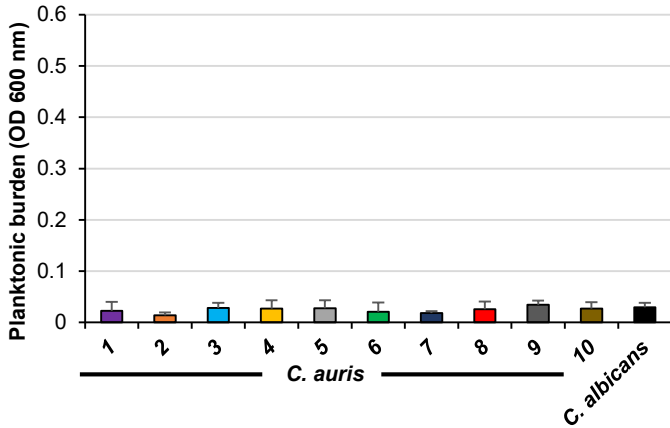

8 h Synthetic sweat

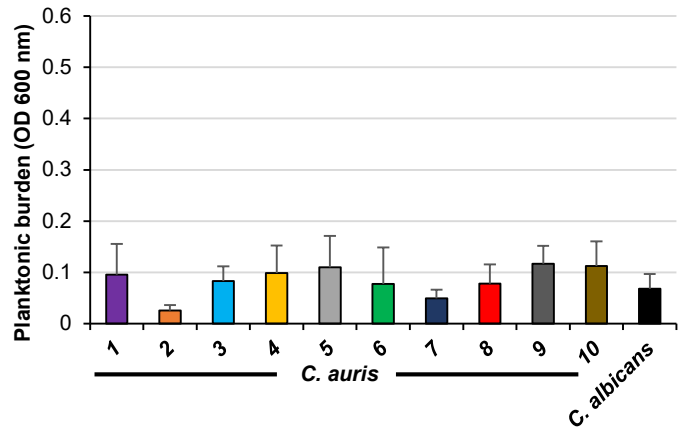

12 h Synthetic sweat

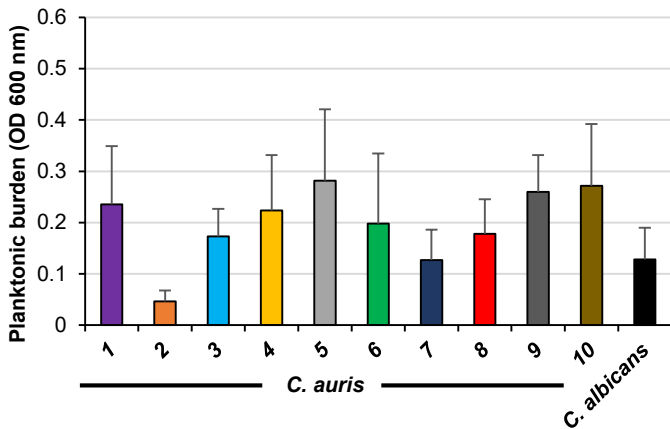

16 h Synthetic sweat

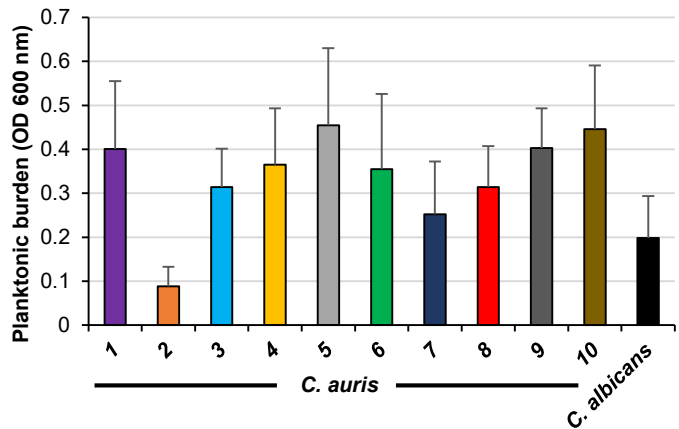

**Fig. S2. Planktonic growth of *C. auris* in synthetic sweat.** Strains were grown in synthetic sweat media at 37°C with shaking for 16 h. *C. auris* growth was analyzed using one-way ANOVA with Holm-Sidak post-test comparison to control (*C. albicans*), no statistical differences, standard deviation shown, n=3.
